# Supplementary material for: An octahedral aluminium(iii) complex as a three-fold node for supramolecular heterometallic self-assemblies: solution and solid state chemistry
Source: Royal Society of Chemistry journal article supplement (doi:10.1039/c4ra00575a), 2014-01-01
Supplement: c4ra00575a1.pdf [file c4ra00575a1.pdf]

# An Octahedral Aluminium(III) Complex as a Three-Fold node for Supramolecular Heterometallic Self-Assemblies: Solution and Solid State Chemistry

Damien Simond,<sup>[a]</sup> Sarah E. Clifford,<sup>[a,b]</sup> Andreia F. Vieira,<sup>[a]</sup> Céline Besnard<sup>[c]</sup> and Alan F. Williams\*<sup>[a]</sup>

Supplementary material

Figure S1. Change in spectrum of  $[\text{AlL}_3]$   $10^{-2}\text{M}$  titrated with  $\text{Cu(II)}$   $5 \cdot 10^{-2}\text{M}$  in acetonitrile.

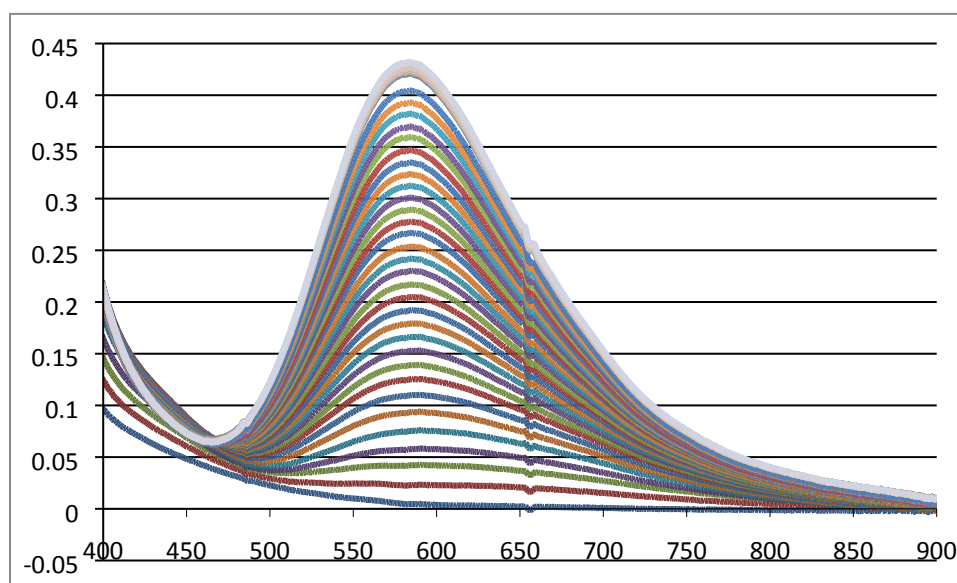

Table S1. Diffusion coefficients measured by DOSY for different protons.

|                                       | $\alpha$ -py | $\beta$ -py | $\text{CH}_2$ | mean [ $\text{m}^2 \cdot \text{s}^{-1}$ ] | $r_h$ [ $\text{\AA}$ ] |
|---------------------------------------|--------------|-------------|---------------|-------------------------------------------|------------------------|
| $\text{AlL}_3$                        | 2.30E-10     | 2.24E-10    | 2.24E-10      | 2.26E-10                                  | 4.86                   |
| $[\text{Pd}_6(\text{AlL}_3)_8]^{12+}$ | 7.64E-11     | 7.45E-11    | 7.72E-11      | 7.60E-11                                  | 14.46                  |

Table S2. Hydrogen-bond geometries ( $\text{\AA}$ ,  $^\circ$ ) for  $\text{AlL}_3 \cdot \text{H}_2\text{O}$  and  $[(\text{AlL}_3)\{\text{Co}(\text{NCS})_2(\text{H}_2\text{O})\}]_n$

| D-H .. A                                                            | D-H ( $\text{\AA}$ ) | H .. A ( $\text{\AA}$ ) | D ... A ( $\text{\AA}$ ) | D-H .. A ( $^\circ$ ) | symop          |
|---------------------------------------------------------------------|----------------------|-------------------------|--------------------------|-----------------------|----------------|
| $\text{AlL}_3 \cdot \text{H}_2\text{O}$                             |                      |                         |                          |                       |                |
| O44 -- H44A .. N37                                                  | 0.8500               | 1.9900                  | 2.788(10)                | 158.00                | 1-x,y,-z       |
| O44 -- H44B .. N23                                                  | 0.8500               | 2.4800                  | 3.084(12)                | 129.00                | 1/2-x,1/2+y,-z |
| $[(\text{AlL}_3)\{\text{Co}(\text{NCS})_2(\text{H}_2\text{O})\}]_n$ |                      |                         |                          |                       |                |
| OW1 -- HW1A .. O10B                                                 | 0.8500               | 1.9200                  | 2.735(7)                 | 160.00                | 1+x,y,z        |
| OW1 -- HW1B .. O13C                                                 | 0.8500               | 2.2900                  | 2.864(7)                 | 125.00                | 1+x,y,z        |
